# Supplementary material for: Docetaxel-Loaded Disulfide Cross-Linked Nanoparticles Derived from Thiolated Sodium Alginate for Colon Cancer Drug Delivery
Source: PubMed Central journal article supplement (PMC7023491; doi:10.3390/pharmaceutics12010038), 2020-01-02
Supplement: pharmaceutics-12-00038-s001.pdf [file pharmaceutics-12-00038-s001.pdf]

# Supplementary Materials: Docetaxel-Loaded Disulfide Cross-Linked Nanoparticles Derived from Thiolated Sodium Alginate for Colon Cancer Drug Delivery

Hock Ing Chiu, Asila Dinie Ayub, Siti Nur Aishah Mat Yusuf, Noorfatimah Yahaya, Erazuliana Abbd Kadir and Vuanghao Lim

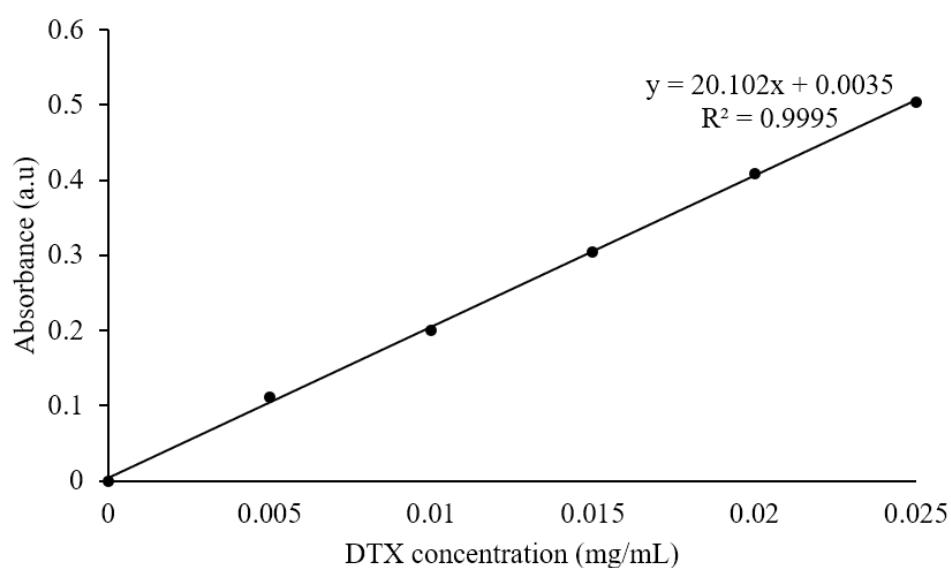

**Figure S1.** The calibration curve of DTX.

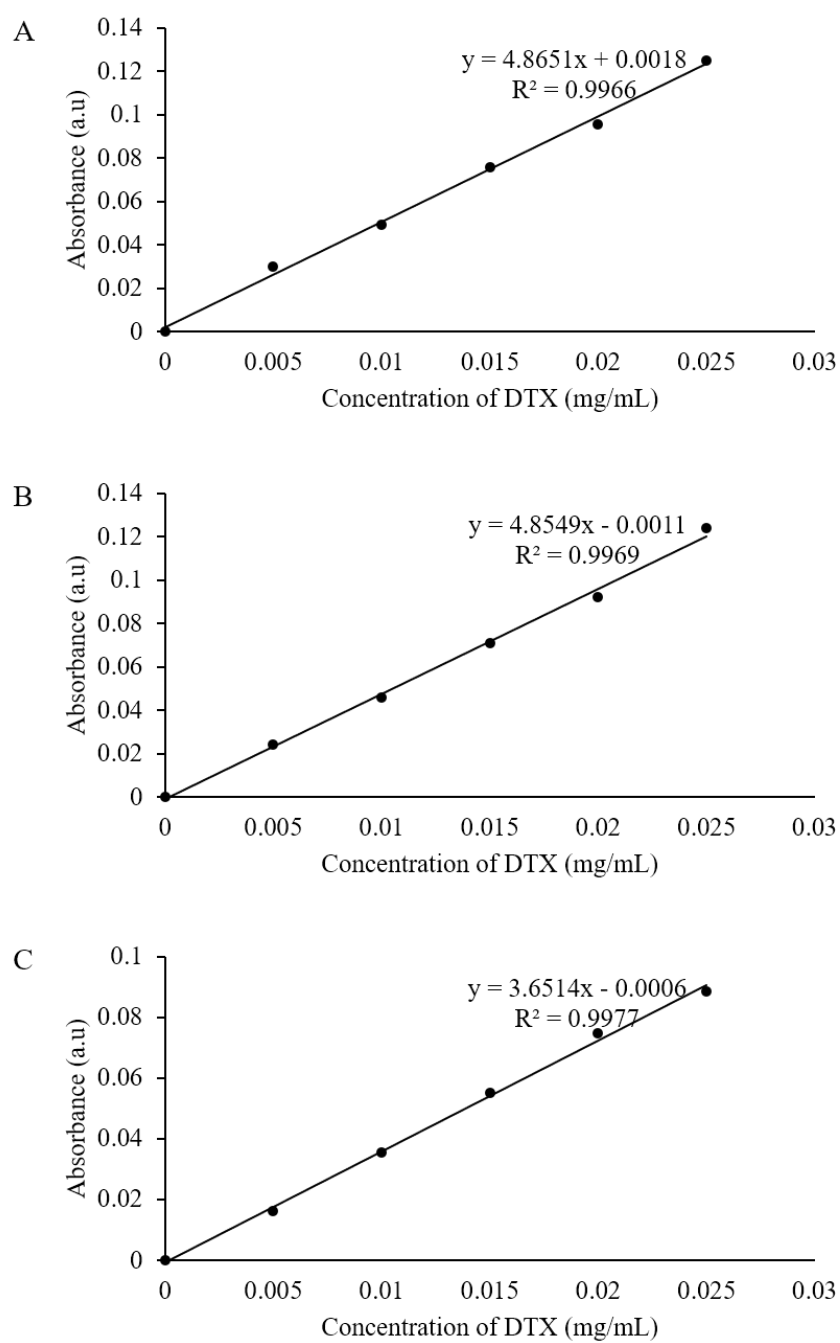

**Figure S2.** The calibration curves of DTX in pH (a) 1.0, (b) 7.4 and (c) 6.0 media.
